# Supplementary material
Source: MDPI journal article supplement (https://www.mdpi.com/2073-4441/16/2/193)
Supplement: s1 [file s1]

## **Appendix: Supplementary materials**

**Economic and industrial development significantly contribute to acidity  
and ionic compositions of rainwater in China**

**Xi Huang, Siyue Li\***

School of Environmental Ecology and Biological Engineering, Institute of  
Changjiang Water Environment and Ecological Security, Hubei Key  
Laboratory of Novel Reactor and Green Chemical Technology, Wuhan  
Institute of Technology, Wuhan 430205, China

**\* Corresponding author:**

**Siyue Li,**

Wuhan Institute of Technology, Wuhan, China

Email: [syli2006@163.com](mailto:syli2006@163.com)

**Table S1.** The mean of pH and ions concentration in rainwater of each site in China.

| City      | Ca <sup>2+</sup> | Mg <sup>2+</sup> | NH <sub>4</sub> <sup>+</sup> (μeq/L) | K <sup>+</sup> (μeq/L) | Na <sup>+</sup> (μeq/L) | SO <sub>4</sub> <sup>2-</sup> (μeq/L) | NO <sub>3</sub> <sup>-</sup> | Cl <sup>-</sup> (μeq/L) | F <sup>-</sup> (μeq/L) | pH        | Year             | reference                                                             |
|-----------|------------------|------------------|--------------------------------------|------------------------|-------------------------|---------------------------------------|------------------------------|-------------------------|------------------------|-----------|------------------|-----------------------------------------------------------------------|
| Beijing   | 19.29±140.59     | 44.84±44.69      | 195.43±108.47                        | 19.70±13.84            | 31.68±19.31             | 236.62±143.99                         | 83.92±44.82                  | 50.25±30.38             | 17.95±9.48             | 5.50±0.87 | 1992-2015, 2017- | [59–67]                                                               |
| Shanghai  | 148.37±101.80    | 22.51±16.35      | 96.84±33.71                          | 13.65±10.03            | 41.23±31.71             | 177.66±111.32                         | 37.75±10.53                  | 55.26±34.65             | 16.46±10.36            | 5.16±0.54 | 1980, 1990-2010, | [59], [61], [68–73]                                                   |
| Hangzhou  | 137.00±123.51    | 12.15±8.44       | 68.20±10.02                          | 16.91±17.77            | 19.11±11.49             | 69.29±50.89                           | 29.64±13.42                  | 21.71±6.69              | 21.60                  | 5.27±1.33 | 1985-1997, 2006- | [22], [74,75]                                                         |
| Nanjing   | 147.83±117.14    | 22.13±10.58      | 111.65±66.82                         | 20.28±4.45             | 30.81±17.63             | 83.12±77.99                           | 45.51±5.03                   | 79.93±50.16             | 15.74±12.23            | 5.89±0.50 | 1992-2003, 2016- | [59], [61], [74], [76]                                                |
| Jinan     | 218.51±82.81     | 45.78±21.05      | 208.36±74.44                         | 15.67±9.76             | 43.44±28.40             | 263.41±147.73                         | 114.26±43.68                 | 48.37±25.84             | 11.43±10.02            | 6.12±0.95 | 2001-2020        | [59], [77,78]                                                         |
| Yantai    | 309.00           | 73.30            | 88.90                                | 41.30                  | 183.90                  | 188.50                                | 76.30                        | 221.40                  | 5.30                   | 6.82      | 2016-2020        | [79]                                                                  |
| Shenzhen  | 50.69±29.97      | 6.79±4.02        | 33.40±12.49                          | 3.69±2.92              | 20.65±12.90             | 68.04±15.43                           | 27.10±14.71                  | 31.04±15.26             | 6.07±7.38              | 4.45±0.11 | 1986-2009        | [16], [21], [73], [80–81]                                             |
| Guangzhou | 100.13±57.15     | 13.25±5.98       | 52.34±25.10                          | 14.53±9.65             | 36.33±21.20             | 155.21±66.24                          | 43.43±27.81                  | 39.87±32.36             | 12.60±6.92             | 4.56±0.23 | 2003-2006        | [16], [22], [69], [74], [80], [82,83]                                 |
| Zhuhai    | 30.16±14.94      | 12.17±5.13       | 32.39±19.35                          | 5.67±4.40              | 41.11±18.46             | 38.84±14.65                           | 19.78±4.45                   | 43.50±18.01             | -                      | 4.97±0.22 | 2000-2020        | <a href="#">EANET</a>                                                 |
| Xiamen    | 59.44±124.32     | 8.52±5.47        | 34.24±9.49                           | 6.30±7.59              | 20.29±13.11             | 56.06±27.62                           | 27.57±8.47                   | 28.86±17.37             | -                      | 4.85±0.43 | 2000-2020        | [22], <a href="#">EANET</a>                                           |
| Wuhan     | 89.25±25.10      | 38.33±29.47      | 98.61±9.04                           | 19.87±21.58            | 33.69±32.89             | 71.45±11.19                           | 72.25±3.42                   | 25.35±12.75             | 15.70±4.47             | 6.21±0.18 | 2020-2021        | <a href="https://sthjt.hubei.gov.cn/">https://sthjt.hubei.gov.cn/</a> |
| Zhengzhou | 357.10±96.81     | 95.29±105.24     | 202.95±29.12                         | 32.52±18.53            | 74.81±37.90             | 317.20±98.75                          | 89.11±22.83                  | 355.02±224.99           | 16.68±4.70             | 5.91±0.71 | 1995-2006, 2018- | [21], [59], [84]                                                      |
| Nanchang  | 55.81±18.94      | 6.55±1.68        | 61.31±7.18                           | 5.60±2.12              | 11.09±4.89              | 74.54±31.89                           | 33.70±7.60                   | 19.37±6.75              | 11.05±2.39             | 4.28±0.32 | 2007-2008, 2013- | [23], [85,86]                                                         |
| Hengyang  | 40.49±21.84      | 4.80±3.01        | 71.65±10.46                          | 3.39±2.91              | 3.86±3.90               | 64.15±20.75                           | 32.48±9.03                   | 9.23±3.20               | 26.99±21.40            | 5.14±0.37 | 2015-2019        | [87]                                                                  |
| Chongqing | 115.23±91.91     | 18.42±38.00      | 91.34±28.00                          | 12.55±17.18            | 7.41±6.09               | 192.02±109.60                         | 43.27±14.91                  | 13.15±10.68             | 3.68±0.74              | 4.58±0.51 | 2001-2020        | [73], [74], [79], [88,89], <a href="#">EANET</a>                      |
| Chengdu   | 142.11±76.44     | 15.52±7.01       | 180.88±49.12                         | 13.94±10.38            | 17.83±12.24             | 168.66±67.90                          | 62.70±41.03                  | 35.90±16.86             | 21.91±10.59            | 5.12±0.67 | 1995-2002, 2008  | [90–92]                                                               |
| Kunming   | 220.30±44.57     | 33.33±9.45       | 43.59±24.14                          | 10.07±4.07             | 16.36±7.48              | 108.04±32.58                          | 31.38±10.23                  | 24.63±7.87              | 14.69±4.03             | 7.41±0.14 | 2015-2019        | [93]                                                                  |
| Lasa      | 181.93±27.66     | 9.46±3.27        | 11.50±3.96                           | 9.92±4.83              | 36.65±45.34             | 4.61±1.88                             | 5.39±2.94                    | 17.65±6.89              | 0.40                   | 7.50      | 1998-2000, 2003  | [69], [92], [94]                                                      |
| Lijiang   | 51.45±59.40      | 9.32±6.49        | 10.56±7.69                           | 4.56±5.73              | 7.59±11.35              | 27.06±28.18                           | 8.94±11.82                   | 13.80±16.25             | 0.60                   | 6.26±0.18 | 1991-1993, 2006, | [69], [93], [95], <a href="#">EANET</a>                               |
| Xi'an     | 333.42±256.38    | 47.46±34.48      | 120.95±88.94                         | 23.77±36.82            | 59.38±54.65             | 293.86±287.00                         | 53.50±41.58                  | 42.98±56.36             | 27.77±1.70             | 6.43±0.48 | 2000-2020        | [21], [59], [69], [96,97], <a href="#">EANET</a>                      |
| Wulumuqi  | 59.98±76.27      | 5.98±8.12        | 8.49±11.14                           | 2.72±1.20              | 11.86±5.60              | 35.00±12.58                           | 5.65±2.88                    | 11.21±4.82              | 0.61±0.05              | 7.71±0.59 | 2003, 2017-2019  | [22], [98]                                                            |
| Lanzhou   | 775.72±239.73    | 67.72±25.63      | 224.10±151.88                        | 61.63±62.49            | 108.90±99.73            | 481.80±203.98                         | 177.58±83.22                 | 77.94±31.93             | 12.50±5.00             | 7.57±0.10 | 2009, 2019-2020  | [92], 99]                                                             |
| Tianshan  | 219.07±169.96    | 24.91±22.73      | 17.81±14.44                          | 6.46±5.37              | 24.37±21.28             | 62.93±44.09                           | 15.83±12.85                  | 25.89±28.24             | -                      | 7.13      | 2003-2004        | [94], [100,101]                                                       |
| Wuzhishan | 14.05±9.26       | 3.64±1.36        | 17.35±3.75                           | 2.78±0.13              | 8.04±0.91               | 10.99±3.63                            | 9.61±0.23                    | 7.93±0.70               | -                      | 5.92±0.04 | 2019-2020        | <a href="#">EANET</a>                                                 |

**Table S2.** The spearman correlation coefficients of social-economic indicators and Cl-normalized equivalent unit ratios in precipitation in China.

|                                                | Ca <sup>2+</sup> /Cl <sup>-</sup> | Mg <sup>2+</sup> /Cl <sup>-</sup> | NH <sub>4</sub> <sup>+</sup> /Cl <sup>-</sup> | K <sup>+</sup> /Cl <sup>-</sup> | Na <sup>+</sup> /Cl <sup>-</sup> | SO <sub>4</sub> <sup>2-</sup> /Cl <sup>-</sup> | NO <sub>3</sub> <sup>-</sup> /Cl <sup>-</sup> | F <sup>-</sup> /Cl <sup>-</sup> | pH     | Population | GDP    | GDP per capita | Wastewater | Industrial wastewater | SO <sub>2</sub> | Industrial SO <sub>2</sub> |
|------------------------------------------------|-----------------------------------|-----------------------------------|-----------------------------------------------|---------------------------------|----------------------------------|------------------------------------------------|-----------------------------------------------|---------------------------------|--------|------------|--------|----------------|------------|-----------------------|-----------------|----------------------------|
| Ca <sup>2+</sup> /Cl <sup>-</sup>              | 1.00                              | 0.86**                            | 0.45*                                         | 0.72**                          | 0.32                             | 0.62**                                         | 0.44*                                         | 0.11                            | 0.45*  | 0.04       | -0.12  | -0.44*         | 0.40       | -0.16                 | 0.02            | 0.07                       |
| Mg <sup>2+</sup> /Cl <sup>-</sup>              |                                   | 1.00                              | 0.60**                                        | 0.68**                          | 0.32                             | 0.62**                                         | 0.53**                                        | 0.17                            | 0.49*  | 0.27       | 0.15   | -0.22          | 0.42       | -0.13                 | -0.26           | 0.07                       |
| NH <sub>4</sub> <sup>+</sup> /Cl <sup>-</sup>  |                                   |                                   | 1.00                                          | 0.64**                          | -0.27                            | 0.70**                                         | 0.93**                                        | 0.57**                          | -0.20  | 0.61**     | 0.35   | -0.22          | 0.47       | 0.09                  | 0.12            | 0.28                       |
| K <sup>+</sup> /Cl <sup>-</sup>                |                                   |                                   |                                               | 1.00                            | 0.22                             | 0.55**                                         | 0.64**                                        | 0.35                            | 0.17   | 0.24       | 0.12   | -0.26          | 0.54       | 0.12                  | -0.14           | 0.01                       |
| Na <sup>+</sup> /Cl <sup>-</sup>               |                                   |                                   |                                               |                                 | 1.00                             | -0.03                                          | -0.22                                         | -0.34                           | 0.57** | -0.33      | -0.09  | 0.23           | -0.13      | -0.31                 | -0.60           | -0.20                      |
| SO <sub>4</sub> <sup>2-</sup> /Cl <sup>-</sup> |                                   |                                   |                                               |                                 |                                  | 1.00                                           | 0.74**                                        | 0.35                            | -0.06  | 0.39       | 0.30   | -0.15          | 0.53       | -0.05                 | 0.33            | 0.36                       |
| NO <sub>3</sub> <sup>-</sup> /Cl <sup>-</sup>  |                                   |                                   |                                               |                                 |                                  |                                                | 1.00                                          | 0.53*                           | -0.27  | 0.48*      | 0.26   | -0.17          | 0.32       | -0.06                 | -0.26           | 0.13                       |
| F <sup>-</sup> /Cl <sup>-</sup>                |                                   |                                   |                                               |                                 |                                  |                                                |                                               | 1.00                            | -0.47* | 0.42       | 0.20   | 0.04           | 0.19       | 0.14                  | 0.07            | -0.52                      |
| pH                                             |                                   |                                   |                                               |                                 |                                  |                                                |                                               |                                 | 1.00   | -0.024     | -0.05  | 0.14           | -0.12      | -0.54*                | -0.48           | -0.26                      |
| Population                                     |                                   |                                   |                                               |                                 |                                  |                                                |                                               |                                 |        | 1.00       | 0.73** | -0.05          | 0.86**     | 0.49                  | 0.57            | 0.43                       |
| GDP                                            |                                   |                                   |                                               |                                 |                                  |                                                |                                               |                                 |        |            | 1.00   | 0.49*          | 0.67*      | 0.38                  | 0.21            | 0.27                       |
| GDP per capita                                 |                                   |                                   |                                               |                                 |                                  |                                                |                                               |                                 |        |            |        | 1.00           | -0.62      | -0.41                 | -0.67           | -0.49                      |
| Wastewater r                                   |                                   |                                   |                                               |                                 |                                  |                                                |                                               |                                 |        |            |        |                | 1.00       | 0.73*                 | 0.75            | 0.48                       |
| Industrial Wastewater r                        |                                   |                                   |                                               |                                 |                                  |                                                |                                               |                                 |        |            |        |                |            | 1.00                  | 0.52            | 0.65*                      |
| SO <sub>2</sub>                                |                                   |                                   |                                               |                                 |                                  |                                                |                                               |                                 |        |            |        |                |            |                       | 1.00            | 0.94**                     |

---

|            |  |
|------------|--|
| Industrial |  |
|------------|--|

|  |      |
|--|------|
|  | 1.00 |
|--|------|

---

|                 |  |
|-----------------|--|
| SO <sub>2</sub> |  |
|-----------------|--|

**Table S3.** The comparison of the mean pH values with other mountains.

|                   | Height (m) | Area        | Year      | pH   | Reference  |
|-------------------|------------|-------------|-----------|------|------------|
| Tianshan          | 2119       | North China | 2003-2004 | 7.13 | This study |
| Wuzhishan         | 958        | South China | 2019-2020 | 5.92 | This study |
| Leigongshan       | 1630       | South China | 2003      | 4.44 | [102]      |
| Waliguan          | 3816       | North China | 1997      | 6.38 | [103]      |
| Mangdang Mountain | 1382       | South China | 1981-1983 | 5.41 | [104]      |
| Lushan            | 1150       | South China | 1987      | 5.13 | [105]      |
|                   |            |             | 2007-2009 | 4.25 | [106]      |

**Table S4.** The value of nss-Ca<sup>2+</sup>, nss-SO<sub>4</sub><sup>2-</sup>, NP, AP and NP/AP of rainwater from 24 sites.

| City      | nss-Ca <sup>2+</sup> | nss-SO <sub>4</sub> <sup>2-</sup> | NP     | AP     | NP/AP |
|-----------|----------------------|-----------------------------------|--------|--------|-------|
| Beijing   | 217.90               | 232.66                            | 413.33 | 316.57 | 1.31  |
| Shanghai  | 146.56               | 172.51                            | 243.40 | 210.25 | 1.16  |
| Hangzhou  | 136.16               | 66.90                             | 204.36 | 96.54  | 2.12  |
| Nanjing   | 146.47               | 79.27                             | 258.12 | 124.78 | 2.07  |
| Jinan     | 216.60               | 257.98                            | 424.96 | 372.24 | 1.14  |
| Yantai    | 300.91               | 165.51                            | 389.81 | 241.81 | 1.61  |
| Shenzhen  | 49.78                | 65.46                             | 83.18  | 92.56  | 0.90  |
| Guangzhou | 98.53                | 150.67                            | 150.87 | 194.10 | 0.78  |
| Zhuhai    | 28.36                | 33.70                             | 60.74  | 53.48  | 1.14  |
| Xiamen    | 58.55                | 53.53                             | 92.79  | 81.10  | 1.14  |
| Wuhan     | 87.77                | 67.24                             | 186.38 | 139.49 | 1.34  |
| Zhengzhou | 353.80               | 307.85                            | 556.76 | 396.96 | 1.40  |
| Nanchang  | 55.32                | 73.15                             | 116.63 | 106.85 | 1.09  |
| Hengyang  | 40.32                | 63.67                             | 111.97 | 96.15  | 1.16  |
| Chongqing | 114.91               | 191.09                            | 206.25 | 234.37 | 0.88  |
| Chengdu   | 141.33               | 166.43                            | 322.21 | 229.13 | 1.41  |
| Kunming   | 219.58               | 106.00                            | 263.17 | 137.38 | 1.92  |
| Lasa      | 180.31               | 0.03                              | 191.81 | 5.42   | 35.40 |
| LiJiang   | 51.12                | 26.11                             | 61.68  | 35.05  | 1.76  |
| Xi'an     | 330.81               | 286.44                            | 451.76 | 339.94 | 1.33  |
| Wulumuqi  | 59.46                | 33.52                             | 67.95  | 39.17  | 1.73  |
| Lanzhou   | 770.93               | 468.19                            | 995.03 | 645.77 | 1.54  |
| Tianshan  | 217.99               | 59.88                             | 235.80 | 75.71  | 3.11  |

$$\text{nss-Ca}^{2+} = [\text{Ca}^{2+}]_{\text{rainwater}} - [\text{Na}^+]_{\text{rainwater}} \times ([\text{Ca}^{2+}] / [\text{Na}^+])_{\text{seawater}}; \text{nss-SO}_4^{2-} = [\text{SO}_4^{2-}]_{\text{rainwater}} - [\text{Na}^+]_{\text{rainwater}} \times ([\text{SO}_4^{2-}] / [\text{Na}^+])_{\text{seawater}}; \text{NP/AP} = [\text{nss-Ca}^{2+} + \text{NH}_4^+] / [\text{nss-SO}_4^{2-} + \text{NO}_3^-].$$

**Table S5.** Cl-normalized equivalent unit ratios in rainwater.

| City      | Ca <sup>2+</sup> / Cl <sup>-</sup> | Mg <sup>2+</sup> / Cl <sup>-</sup> | NH <sub>4</sub> <sup>+</sup> / Cl <sup>-</sup> | K <sup>+</sup> / Cl <sup>-</sup> | Na <sup>+</sup> / Cl <sup>-</sup> | SO <sub>4</sub> <sup>2-</sup> / Cl <sup>-</sup> | NO <sub>3</sub> <sup>-</sup> / Cl <sup>-</sup> | F <sup>-</sup> / Cl <sup>-</sup> |
|-----------|------------------------------------|------------------------------------|------------------------------------------------|----------------------------------|-----------------------------------|-------------------------------------------------|------------------------------------------------|----------------------------------|
| Beijing   | 4.92                               | 0.88                               | 5.56                                           | 0.44                             | 0.68                              | 6.06                                            | 2.34                                           | 0.44                             |
| Shanghai  | 2.88                               | 0.40                               | 2.18                                           | 0.25                             | 0.75                              | 3.36                                            | 0.87                                           | 0.34                             |
| Hangzhou  | 6.70                               | 0.60                               | 3.53                                           | 0.84                             | 0.93                              | 3.53                                            | 1.48                                           | 0.82                             |
| Nanjing   | 1.69                               | 0.30                               | 1.54                                           | 0.36                             | 0.54                              | 1.11                                            | 0.80                                           | 0.30                             |
| Jinan     | 4.84                               | 0.98                               | 5.05                                           | 0.31                             | 0.85                              | 5.42                                            | 2.72                                           | 0.22                             |
| Yantai    | 1.40                               | 0.33                               | 1.40                                           | 0.19                             | 0.83                              | 0.85                                            | 0.34                                           | 0.02                             |
| Shenzhen  | 1.71                               | 0.21                               | 1.26                                           | 0.12                             | 0.64                              | 2.56                                            | 0.93                                           | 0.20                             |
| Guangzhou | 3.47                               | 0.42                               | 1.70                                           | 0.43                             | 1.08                              | 5.64                                            | 1.38                                           | 0.37                             |
| Zhuhai    | 0.78                               | 0.30                               | 0.81                                           | 0.14                             | 0.98                              | 1.00                                            | 0.53                                           | -                                |
| Xiamen    | 1.89                               | 0.31                               | 1.56                                           | 0.23                             | 0.76                              | 2.28                                            | 1.19                                           | -                                |
| Wuhan     | 3.74                               | 1.40                               | 4.55                                           | 0.65                             | 1.15                              | 3.10                                            | 3.22                                           | 0.66                             |
| Zhengzhou | 2.19                               | 0.46                               | 1.55                                           | 0.13                             | 0.50                              | 1.48                                            | 0.81                                           | 0.33                             |
| Nanchang  | 2.94                               | 0.39                               | 3.85                                           | 0.37                             | 0.64                              | 4.53                                            | 2.12                                           | 0.71                             |
| Hengyang  | 5.66                               | 0.69                               | 9.03                                           | 0.37                             | 0.44                              | 8.60                                            | 4.27                                           | 4.10                             |
| Chongqing | 9.98                               | 1.69                               | 9.08                                           | 0.84                             | 0.58                              | 16.34                                           | 4.71                                           | 0.29                             |
| Chengdu   | 5.59                               | 0.58                               | 7.79                                           | 0.62                             | 0.49                              | 3.28                                            | 3.10                                           | 0.69                             |
| Kunming   | 9.71                               | 1.48                               | 2.01                                           | 0.44                             | 0.68                              | 4.83                                            | 1.36                                           | 0.67                             |
| Lasa      | 12.15                              | 0.64                               | 0.94                                           | 0.56                             | 1.90                              | 0.31                                            | 0.38                                           | 0.04                             |
| Lijiang   | 8.74                               | 1.88                               | 3.96                                           | 0.59                             | 0.80                              | 3.82                                            | 1.40                                           | 0.29                             |
| Xi'an     | 11.58                              | 2.08                               | 4.40                                           | 0.93                             | 2.01                              | 9.04                                            | 1.77                                           | 0.54                             |
| Wulumuqi  | 4.64                               | 0.45                               | 0.65                                           | 0.25                             | 1.09                              | 3.44                                            | 0.51                                           | 0.07                             |
| Lanzhou   | 12.98                              | 1.01                               | 2.96                                           | 0.68                             | 1.20                              | 6.50                                            | 2.45                                           | 0.20                             |
| Tianshan  | 18.05                              | 2.89                               | 1.87                                           | 0.31                             | 1.27                              | 3.75                                            | 0.92                                           | -                                |
| Wuzhishan | 1.83                               | 0.47                               | 2.18                                           | 0.35                             | 1.02                              | 1.41                                            | 1.22                                           | -                                |

**Table S6.** Principal component analysis (PCA) of the major ions. (Maximum variance method was used).

|                               | PC1    | PC2    | PC3    |
|-------------------------------|--------|--------|--------|
| Ca <sup>2+</sup>              | 0.64   | 0.58   | 0.24   |
| Mg <sup>2+</sup>              | 0.57   | 0.39   | 0.28   |
| NH <sub>4</sub> <sup>+</sup>  | 0.14   | 0.93   | -0.11  |
| K <sup>+</sup>                | 0.81   | 0.37   | 0.08   |
| Na <sup>+</sup>               | 0.89   | 0.21   | 0.04   |
| SO <sub>4</sub> <sup>2-</sup> | 0.47   | 0.84   | -0.02  |
| NO <sub>3</sub> <sup>-</sup>  | 0.24   | 0.92   | -0.03  |
| Cl <sup>-</sup>               | 0.80   | 0.10   | -0.12  |
| F <sup>-</sup>                | 0.23   | 0.14   | -0.68  |
| pH                            | 0.27   | 0.08   | 0.78   |
| % variance                    | 51.47% | 13.30% | 10.44% |
| % cumulative                  | 51.47% | 64.77% | 75.21% |



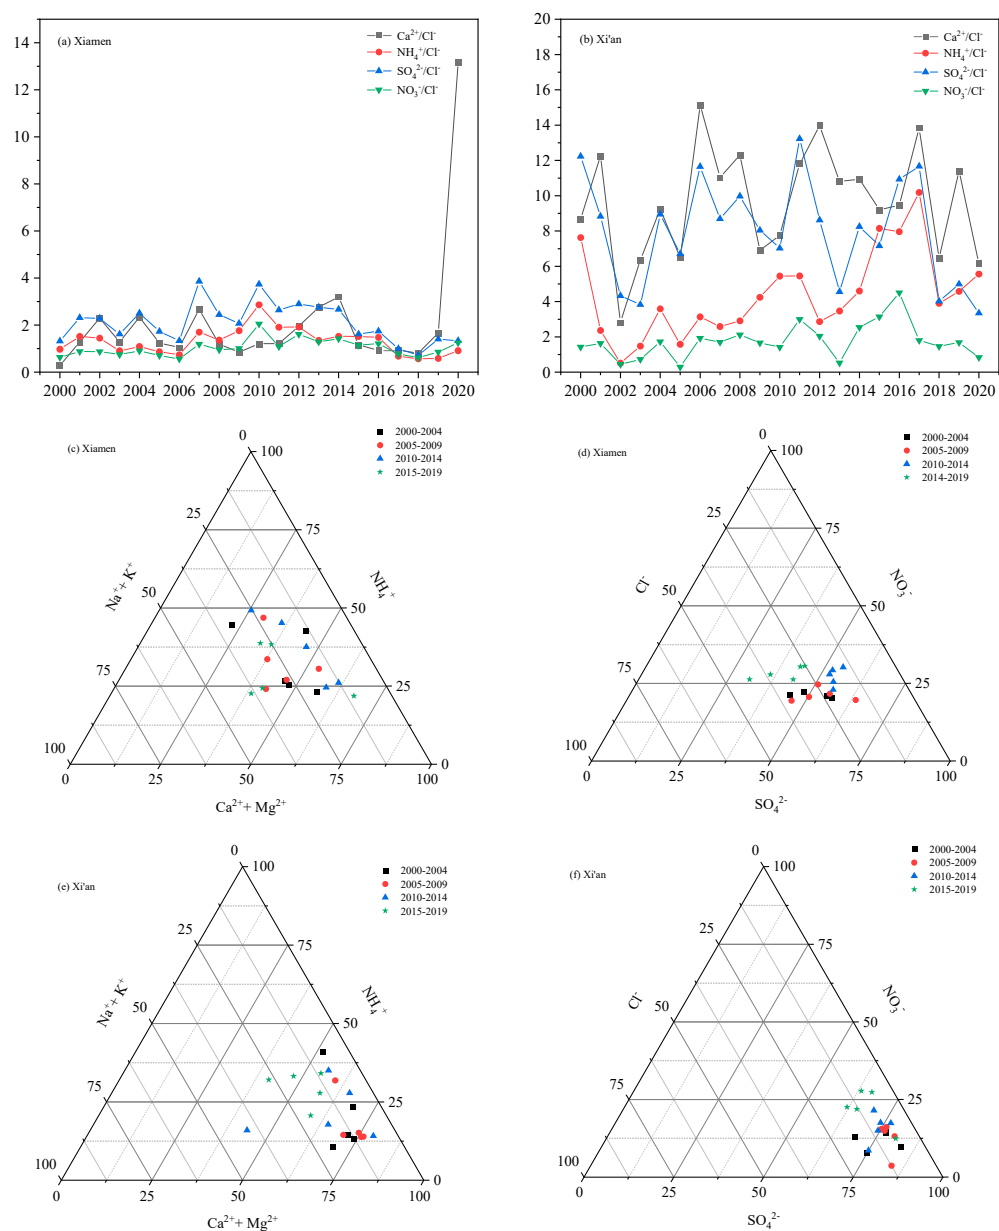

**Figure. S1.** Temporal variations of Cl-normalized equivalent unit ratios and triangular diagrams of rainwater chemical ions in Xiamen and Xi'an.
